# Supplementary material for: CASSCF and CASMP2 study on the photoisomerization mechanisms of [tris(trialkylsilyl)silyl]cyclotetrasilene and related cyclobutene molecules
Source: Royal Society of Chemistry journal article supplement (doi:10.1039/c7ra00506g), 2017-01-01
Supplement: c7ra00506g1.pdf [file c7ra00506g1.pdf]

# Supplementary Materials

## CASSCF and CASMP2

### Study on the

### Photoisomerization

### Mechanisms of

### [Tris(trialkylsilyl)silyl]cyclobutene

### and Related

### Cyclobutene Molecules

Ming-Der Su<sup>1,2\*</sup>

<sup>1</sup>Department of Applied Chemistry, National Chiayi University, Chiayi 60004,  
Taiwan

<sup>2</sup>Department of Medicinal and Applied Chemistry, Kaohsiung Medical  
University, Kaohsiung 80708, Taiwan

\*E-mail: [midesu@mail.ncyu.edu.tw](mailto:midesu@mail.ncyu.edu.tw)

The fixed geometrical parameters (Å) are shown below:

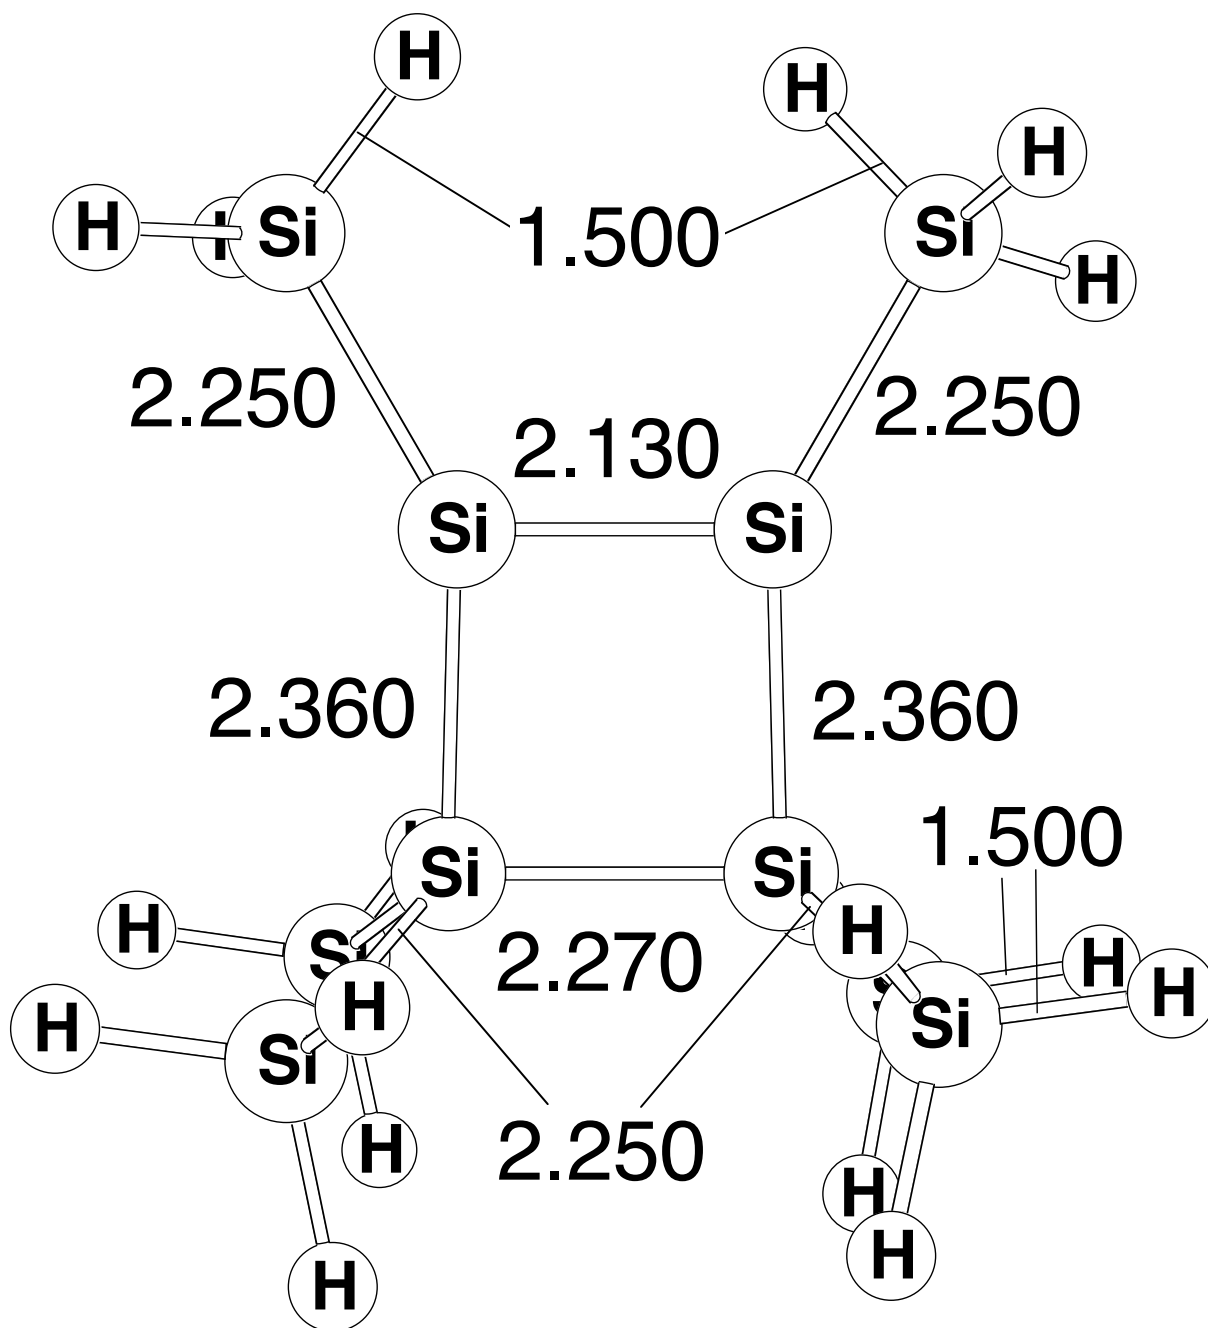

(Also see Figure 1 (a))

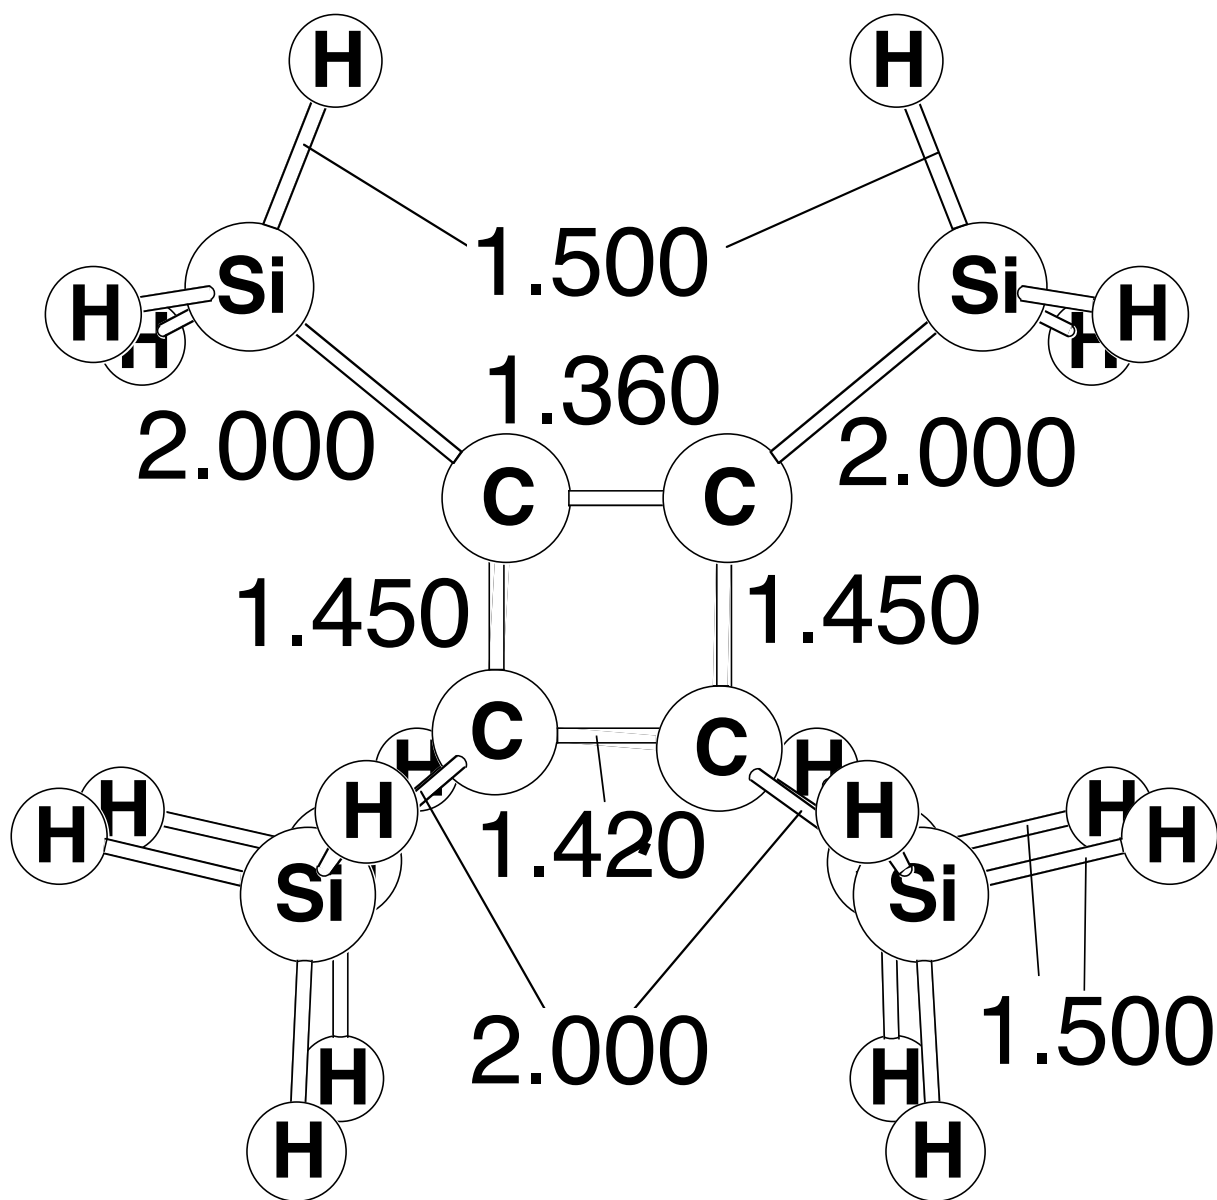

(Also see Figure 1 (b))

**(All were calculated at the CAS(6,6)/6-311G(d) (geometry) and MP2-CAS-(6,6)/6-311++G(3df,3pd)//CAS(6,6)/6-311G(d) (energy) levels of theory)**

(1) Si-Rea-S<sub>0</sub>

| Atomic<br>Number | Coordinates (Angstroms) |           |           |
|------------------|-------------------------|-----------|-----------|
|                  | X                       | Y         | Z         |
| 14               | 0.040703                | -0.009189 | 1.159277  |
| 14               | 0.042236                | -0.028796 | 3.542755  |
| 14               | 2.391057                | 0.032518  | 1.258478  |
| 14               | 2.392456                | 0.073266  | 3.437477  |
| 14               | 4.315495                | 0.452953  | 4.717402  |
| 1                | 4.029648                | 1.339739  | 5.859785  |
| 1                | 4.883601                | -0.818837 | 5.204275  |
| 1                | 5.294747                | 1.099219  | 3.819710  |
| 14               | 4.309050                | 0.431148  | -0.018941 |
| 1                | 5.450723                | 0.241304  | 0.900072  |
| 1                | 4.430990                | -0.503970 | -1.152101 |
| 1                | 4.314645                | 1.818738  | -0.519191 |
| 14               | -1.216884               | 1.707782  | 4.498749  |
| 1                | -1.022834               | 1.742569  | 5.962654  |
| 1                | -2.646383               | 1.452525  | 4.214459  |
| 1                | -0.848189               | 3.016559  | 3.923979  |
| 14               | -0.991622               | 1.895209  | 0.253724  |
| 1                | -0.811192               | 1.916612  | -1.213033 |
| 1                | -2.439956               | 1.861851  | 0.553859  |
| 1                | -0.412908               | 3.124425  | 0.831111  |
| 14               | -0.886675               | -1.936798 | 0.196918  |
| 1                | -0.253586               | -3.142691 | 0.767226  |
| 1                | -0.677993               | -1.923753 | -1.266227 |
| 1                | -2.339377               | -1.985566 | 0.471750  |
| 14               | -0.632806               | -2.080969 | 4.457013  |
| 1                | -0.435911               | -2.054755 | 5.922528  |
| 1                | 0.187881                | -3.165327 | 3.882262  |
| 1                | -2.058187               | -2.350811 | 4.170170  |

MP2-CAS-(6,6)/6-311++G(3df,3pd)//CAS(6,6)/6-311G(d) = -2902.740922

(2) Si-FC-S<sub>1</sub>

MP2-CAS-(6,6)/6-311++G(3df,3pd)//CAS(6,6)/6-311G(d) = -2902.632916

(3) Si-FC-T<sub>1</sub>

MP2-CAS-(6,6)/6-311++G(3df,3pd)//CAS(6,6)/6-311G(d) = -2902.591714

(4) Si-CI

| -----               |                         |               |               |
|---------------------|-------------------------|---------------|---------------|
| Atomic<br>Number    | Coordinates (Angstroms) |               |               |
|                     | X                       | Y             | Z             |
| -----               |                         |               |               |
| 24                  | 0.575231                | -0.033525     | 0.002860      |
| 6                   | -0.406978               | -0.082807     | -1.833763     |
| 6                   | 0.519844                | 1.974396      | -0.004758     |
| 6                   | -0.423785               | -0.077702     | 1.831560      |
| 6                   | 0.702708                | -2.037471     | 0.000414      |
| 6                   | -3.779831               | -0.051266     | -0.002867     |
| 6                   | 2.507590                | 0.055580      | 0.017715      |
| 8                   | -0.891018               | -0.107733     | -2.863346     |
| 8                   | 0.567144                | 3.117259      | -0.013103     |
| 8                   | -0.922620               | -0.101344     | 2.854265      |
| 8                   | 0.848831                | -3.172060     | -0.001342     |
| 8                   | -4.914314               | -0.072711     | -0.027971     |
| 16                  | 4.103643                | 0.125021      | 0.021513      |
| Derivative Coupling |                         |               |               |
| -1                  | -0.0067980577           | 0.0001693235  | -0.0000706855 |
| -2                  | 0.0017620749            | 0.0263058949  | 0.0006378557  |
| -3                  | -0.0038688297           | -0.0000692355 | -0.0061869520 |
| -4                  | 0.0133004496            | -0.0277476744 | 0.0016260719  |
| -5                  | -0.0058369392           | 0.0022356192  | 0.0031227138  |
| -6                  | 0.0001835898            | 0.0001770716  | 0.0001429826  |
| -7                  | -0.0002201559           | -0.0000767213 | -0.0005161607 |
| -8                  | 0.0006796116            | -0.0007332530 | 0.0006086703  |
| -9                  | -0.0022762436           | 0.0028709295  | 0.0018600919  |
| -10                 | -0.0001804930           | 0.0002659982  | -0.0000131691 |
| -11                 | 0.0001247713            | 0.0000488652  | 0.0000383438  |
| -12                 | 0.0002091603            | 0.0008580808  | 0.0003746944  |
| -13                 | -0.0007040608           | -0.0007327715 | -0.0012001565 |
| -14                 | -0.0002235903           | 0.0000923130  | -0.0001637765 |
| -15                 | 0.0003730551            | 0.0005820590  | 0.0005129830  |

|     |               |               |               |
|-----|---------------|---------------|---------------|
| -16 | -0.0000431435 | -0.0000971645 | 0.0000003453  |
| -17 | 0.0004849931  | -0.0001047223 | -0.0002767678 |
| -18 | -0.0000842805 | 0.0000825024  | 0.0000374686  |
| -19 | -0.0001302853 | 0.0000744285  | -0.0000131397 |
| -20 | 0.0000337809  | 0.0000383834  | 0.0000034798  |
| -21 | -0.0005393711 | 0.0005123585  | -0.0002671638 |
| -22 | 0.0001632219  | -0.0003075093 | 0.0000102425  |
| -23 | 0.0000922614  | -0.0001146499 | -0.0000643368 |
| -24 | 0.0000915794  | -0.0001127792 | -0.0000463791 |
| -25 | 0.0033822997  | -0.0036687246 | -0.0002417575 |
| -26 | 0.0004306072  | -0.0003751349 | 0.0009209972  |
| -27 | 0.0000041413  | -0.0010851935 | -0.0005685520 |
| -28 | -0.0004101471 | 0.0009117063  | -0.0002679434 |

Gradient Difference

|     |               |               |               |
|-----|---------------|---------------|---------------|
| -1  | -0.0041401494 | -0.0028176748 | -0.0075852709 |
| -2  | -0.0151503436 | 0.0284502492  | -0.0184223107 |
| -3  | -0.0072988773 | 0.0099771420  | 0.0376203450  |
| -4  | 0.0143491608  | -0.0450793346 | -0.0065231825 |
| -5  | 0.0047701310  | 0.0142292578  | -0.0041711252 |
| -6  | -0.0002086777 | 0.0002840413  | -0.0016854443 |
| -7  | -0.0006879763 | -0.0000375278 | -0.0008332803 |
| -8  | 0.0013388839  | -0.0036565787 | 0.0028818509  |
| -9  | -0.0002007231 | 0.0045603659  | -0.0041483986 |
| -10 | 0.0008118827  | 0.0004775736  | -0.0003099995 |
| -11 | 0.0010710794  | 0.0010226102  | 0.0013589492  |
| -12 | -0.0006398014 | 0.0002531751  | 0.0007461371  |
| -13 | 0.0004253153  | 0.0024970470  | 0.0003013638  |
| -14 | 0.0001450179  | 0.0000169782  | 0.0011079067  |
| -15 | -0.0001029097 | 0.0000088602  | 0.0002757415  |
| -16 | -0.0002058244 | 0.0005914680  | 0.0002616620  |
| -17 | 0.0006670358  | 0.0000112250  | -0.0002604958 |
| -18 | -0.0001242061 | 0.0003447618  | -0.0002341681 |
| -19 | -0.0007579515 | -0.0002732541 | 0.0001646605  |
| -20 | -0.0001354992 | 0.0004249105  | -0.0000954627 |
| -21 | -0.0016179473 | 0.0006859027  | -0.0027679393 |
| -22 | 0.0009957608  | -0.0004843238 | 0.0003796812  |
| -23 | 0.0001943162  | -0.0011577096 | 0.0007423303  |
| -24 | -0.0004314750 | -0.0004036704 | 0.0001912390  |
| -25 | 0.0046450283  | -0.0077277524 | 0.0011634081  |
| -26 | 0.0007544762  | -0.0007157023 | 0.0023558613  |

|     |              |               |               |
|-----|--------------|---------------|---------------|
| -27 | 0.0002759913 | -0.0010518101 | -0.0024137099 |
| -28 | 0.0012582825 | -0.0004302298 | -0.0001003489 |

-----  
 MP2-CAS-(6,6)/6-311++G(3df,3pd)//CAS(6,6)/6-311G(d) = -2902.673647

(5) Si-Pro-S<sub>0</sub>

| Atomic<br>Number | Coordinates (Angstroms) |           |           |
|------------------|-------------------------|-----------|-----------|
|                  | X                       | Y         | Z         |
| 14               | 0.000000                | 0.000000  | 0.000000  |
| 14               | 0.000000                | 0.000000  | 2.370453  |
| 14               | 1.677414                | 0.000000  | -1.649281 |
| 1                | 2.086396                | -1.391718 | -1.922650 |
| 1                | 2.846980                | 0.776814  | -1.196492 |
| 1                | 1.163058                | 0.598799  | -2.896422 |
| 14               | 1.720667                | -0.003299 | 3.970676  |
| 1                | 1.154183                | -0.083496 | 5.331857  |
| 1                | 2.512656                | 1.236291  | 3.853245  |
| 1                | 2.598626                | -1.170191 | 3.755706  |
| 14               | -0.945876               | 1.785533  | 1.150430  |
| 14               | -0.952872               | -1.767590 | 1.182441  |
| 14               | 0.460434                | 3.684563  | 1.155101  |
| 1                | 1.875595                | 3.268074  | 1.229658  |
| 1                | 0.159665                | 4.554156  | 2.312605  |
| 1                | 0.261467                | 4.478800  | -0.075809 |
| 14               | -3.239620               | 2.348554  | 1.071728  |
| 1                | -4.050344               | 1.205451  | 0.612189  |
| 1                | -3.426685               | 3.471671  | 0.127378  |
| 1                | -3.719131               | 2.775481  | 2.402608  |
| 14               | 0.442891                | -3.673949 | 1.168013  |
| 1                | 0.312269                | -4.421967 | 2.436298  |
| 1                | 1.853926                | -3.267521 | 1.001600  |
| 1                | 0.075224                | -4.582805 | 0.061241  |
| 14               | -3.248307               | -2.328264 | 1.257038  |
| 1                | -3.406122               | -3.584032 | 2.023728  |
| 1                | -3.782366               | -2.541507 | -0.104168 |
| 1                | -4.033696               | -1.272372 | 1.923313  |

-----  
 MP2-CAS-(6,6)/6-311++G(3df,3pd)//CAS(6,6)/6-311G(d) = -2902.706975



(6) Si-TS-S<sub>0</sub>

| ----- |                  |                         |           |           |
|-------|------------------|-------------------------|-----------|-----------|
|       | Atomic<br>Number | Coordinates (Angstroms) |           |           |
|       |                  | X                       | Y         | Z         |
| ----- |                  |                         |           |           |
|       | 14               | 0.217248                | -0.246158 | 1.107968  |
|       | 14               | 0.340645                | -0.592228 | 3.457707  |
|       | 14               | 2.562423                | 0.192107  | 1.259313  |
|       | 14               | 2.689664                | -0.973767 | 3.226271  |
|       | 14               | 3.902588                | -0.567154 | 5.194738  |
|       | 1                | 3.081543                | -1.167880 | 6.269017  |
|       | 1                | 5.262559                | -1.132106 | 5.253461  |
|       | 1                | 3.949062                | 0.894351  | 5.405336  |
|       | 14               | 3.114280                | 2.424363  | 1.701660  |
|       | 1                | 4.519242                | 2.517302  | 2.134608  |
|       | 1                | 2.865705                | 3.287654  | 0.533204  |
|       | 1                | 2.245494                | 2.887430  | 2.805934  |
|       | 14               | -0.434720               | 1.257029  | 4.732517  |
|       | 1                | 0.056275                | 1.213512  | 6.124242  |
|       | 1                | -1.910344               | 1.136643  | 4.748440  |
|       | 1                | -0.091234               | 2.566105  | 4.143783  |
|       | 14               | -1.153603               | 1.478748  | 0.244278  |
|       | 1                | -0.943692               | 1.588907  | -1.215284 |
|       | 1                | -2.579938               | 1.161706  | 0.477955  |
|       | 1                | -0.846640               | 2.778027  | 0.872476  |
|       | 14               | -0.256142               | -2.242569 | -0.077170 |
|       | 1                | 0.760430                | -3.276657 | 0.197908  |
|       | 1                | -0.257171               | -1.951053 | -1.527184 |
|       | 1                | -1.587274               | -2.783198 | 0.279662  |
|       | 14               | -0.445484               | -2.676209 | 4.146118  |
|       | 1                | 0.271498                | -3.093864 | 5.369156  |
|       | 1                | -0.054873               | -3.590044 | 3.049420  |
|       | 1                | -1.902228               | -2.756885 | 4.356376  |
| -1    | -0.16            | -0.15                   | -0.14     |           |
| -2    | -0.01            | -0.05                   | 0.03      |           |
| -3    | -0.29            | -0.45                   | -0.24     |           |
| -4    | -0.04            | -0.07                   | -0.14     |           |
| -5    | 0.01             | -0.05                   | 0.00      |           |
| -6    | -0.01            | -0.12                   | -0.04     |           |

|     |       |       |       |
|-----|-------|-------|-------|
| -7  | -0.05 | -0.18 | -0.18 |
| -8  | -0.05 | -0.06 | -0.09 |
| -9  | 0.07  | 0.01  | -0.11 |
| -10 | -0.01 | 0.03  | 0.01  |
| -11 | -0.06 | 0.02  | -0.08 |
| -12 | 0.02  | 0.03  | 0.10  |
| -13 | -0.00 | -0.01 | -0.01 |
| -14 | -0.11 | -0.11 | -0.01 |
| -15 | -0.02 | -0.08 | -0.15 |
| -16 | -0.01 | 0.14  | 0.01  |
| -17 | -0.02 | -0.03 | 0.01  |
| -18 | -0.11 | -0.20 | -0.04 |
| -19 | -0.04 | -0.15 | -0.11 |
| -20 | -0.20 | 0.05  | -0.13 |
| -21 | -0.02 | 0.02  | -0.01 |
| -22 | 0.05  | 0.03  | 0.04  |
| -23 | -0.16 | -0.12 | -0.06 |
| -24 | -0.06 | 0.05  | -0.05 |
| -25 | -0.03 | -0.02 | -0.00 |
| -26 | -0.06 | -0.22 | -0.08 |
| -27 | -0.14 | -0.02 | -0.09 |
| -28 | -0.06 | -0.20 | -0.06 |

-----  
 MP2-CAS-(6,6)/6-311++G(3df,3pd)//CAS(6,6)/6-311G(d) = -2902.687391

(7) C-Rea-S<sub>0</sub>

| Atomic<br>Number | Coordinates (Angstroms) |           |           |
|------------------|-------------------------|-----------|-----------|
|                  | X                       | Y         | Z         |
| 6                | 0.000000                | 0.000000  | 0.000000  |
| 6                | 0.000000                | 0.000000  | 1.352717  |
| 6                | -1.450668               | -0.005030 | -0.072824 |
| 6                | -1.548802               | 0.000801  | 1.323720  |
| 14               | -2.225683               | 1.519148  | 2.287377  |
| 1                | -1.925179               | 1.332203  | 3.717124  |
| 1                | -3.691301               | 1.637721  | 2.135389  |
| 1                | -1.605286               | 2.780283  | 1.849643  |
| 14               | -2.219695               | -1.511810 | 2.301859  |
| 1                | -1.589766               | -2.773508 | 1.880348  |

|    |           |           |           |
|----|-----------|-----------|-----------|
| 1  | -3.684246 | -1.642211 | 2.147427  |
| 1  | -1.924853 | -1.307155 | 3.730368  |
| 14 | -2.104403 | -1.520983 | -1.076292 |
| 1  | -1.797086 | -1.331455 | -2.504412 |
| 1  | -3.568993 | -1.639882 | -0.923946 |
| 1  | -1.473291 | -2.776683 | -0.638712 |
| 14 | -2.106255 | 1.500578  | -1.091636 |
| 1  | -1.485804 | 2.763343  | -0.658698 |
| 1  | -3.573250 | 1.614560  | -0.961342 |
| 1  | -1.779768 | 1.297847  | -2.513826 |
| 14 | 1.311459  | 0.004284  | 2.692108  |
| 1  | 1.164445  | 1.199910  | 3.543869  |
| 1  | 2.649613  | 0.005309  | 2.078771  |
| 1  | 1.167819  | -1.189047 | 3.547688  |
| 14 | 1.375121  | -0.002452 | -1.285460 |
| 1  | 1.269715  | 1.196216  | -2.139357 |
| 1  | 1.255782  | -1.193857 | -2.147894 |
| 1  | 2.684919  | -0.013151 | -0.616023 |

-----  
MP2-CAS-(6,6)/6-311++G(3df,3pd)//CAS(6,6)/6-311G(d) = -1897.453892

(8) C-FC-S<sub>1</sub>

CAS-MP2(6,6)/6-311++G(3df,3pd)//CAS(6,6)/6-311G(d) = -1897.267792

(9) C-FC-T<sub>1</sub>

CAS-MP2(6,6)/6-311++G(3df,3pd)//CAS(6,6)/6-311G(d) = -1897.259792

(10) C-CI

| Atomic<br>Number | Coordinates (Angstroms) |           |           |
|------------------|-------------------------|-----------|-----------|
|                  | X                       | Y         | Z         |
| 6                | -0.199486               | -0.289407 | -0.028153 |
| 6                | -0.133393               | -1.039680 | 1.240622  |
| 6                | -1.570220               | 0.210388  | 0.072879  |
| 6                | -1.982918               | 1.275677  | 1.042184  |
| 14               | -1.216792               | 2.975716  | 0.833524  |
| 1                | 0.229856                | 2.884381  | 0.553080  |
| 1                | -1.428440               | 3.786529  | 2.047735  |
| 1                | -1.862950               | 3.660000  | -0.305865 |

|    |           |           |           |
|----|-----------|-----------|-----------|
| 14 | -3.303867 | 0.955681  | 2.333624  |
| 1  | -2.687580 | 0.326006  | 3.518516  |
| 1  | -4.350162 | 0.047110  | 1.830670  |
| 1  | -3.929622 | 2.225525  | 2.752285  |
| 14 | -0.649733 | -2.845692 | 1.283197  |
| 1  | 0.525114  | -3.723284 | 1.090416  |
| 1  | -1.620875 | -3.130531 | 0.211353  |
| 1  | -1.253031 | -3.171415 | 2.589987  |
| 14 | -2.813857 | -0.296779 | -1.267495 |
| 1  | -3.035530 | 0.841673  | -2.184286 |
| 1  | -4.111714 | -0.694662 | -0.699247 |
| 1  | -2.248568 | -1.421683 | -2.037561 |
| 14 | 0.741219  | -0.261693 | 2.724210  |
| 1  | 0.072702  | 0.952740  | 3.224662  |
| 1  | 2.112999  | 0.108759  | 2.316037  |
| 1  | 0.816480  | -1.248314 | 3.821520  |
| 14 | 0.916679  | -0.520189 | -1.503644 |
| 1  | 0.422814  | 0.322548  | -2.608532 |
| 1  | 0.955516  | -1.930823 | -1.939396 |
| 1  | 2.287164  | -0.114957 | -1.142680 |

Derivative Coupling

|     |               |               |               |
|-----|---------------|---------------|---------------|
| -1  | -0.0295081406 | -0.0042458587 | 0.0139884434  |
| -2  | 0.0111502933  | 0.0041471510  | 0.0074324499  |
| -3  | 0.0223927742  | -0.0049054038 | -0.0253083028 |
| -4  | -0.0081839660 | 0.0004683065  | 0.0142837148  |
| -5  | -0.0018460714 | 0.0013651489  | -0.0021066136 |
| -6  | -0.0000191059 | -0.0005177033 | 0.0001137429  |
| -7  | -0.0001665783 | -0.0001960343 | 0.0000424737  |
| -8  | 0.0000423310  | 0.0001679717  | -0.0002610196 |
| -9  | 0.0022879256  | 0.0000369792  | 0.0015569046  |
| -10 | -0.0000919552 | -0.0001461173 | 0.0000014358  |
| -11 | -0.0000381336 | 0.0001758179  | 0.0001800979  |
| -12 | 0.0000289916  | 0.0000859597  | -0.0000544482 |
| -13 | 0.0013892475  | 0.0015143537  | 0.0000047402  |
| -14 | 0.0001012524  | 0.0000349630  | -0.0000350743 |
| -15 | 0.0000035814  | 0.0002146001  | 0.0001370077  |
| -16 | 0.0000099133  | 0.0001530186  | -0.0000610783 |
| -17 | 0.0044850807  | 0.0064463690  | -0.0056245278 |
| -18 | -0.0006226059 | -0.0001553905 | -0.0003398119 |
| -19 | 0.0005795856  | 0.0000181545  | 0.0002644703  |

|     |               |               |               |
|-----|---------------|---------------|---------------|
| -20 | -0.0001228119 | 0.0001179067  | 0.0001530122  |
| -21 | -0.0003866781 | -0.0019499493 | -0.0007837099 |
| -22 | 0.0000344246  | -0.0001272881 | -0.0001186607 |
| -23 | -0.0001733911 | 0.0000511451  | 0.0001239183  |
| -24 | -0.0000218007 | 0.0000960220  | -0.0000191922 |
| -25 | -0.0011422417 | -0.0029446470 | -0.0037787243 |
| -26 | -0.0000952363 | 0.0000424093  | -0.0000447790 |
| -27 | 0.0001265284  | -0.0001548499 | -0.0002002387 |
| -28 | -0.0002132129 | 0.0002069653  | 0.0004537699  |

Unscaled Gradient Difference

|     |               |               |               |
|-----|---------------|---------------|---------------|
| -1  | -0.0103664136 | 0.0027594370  | 0.0045361046  |
| -2  | 0.0347275170  | -0.0193249379 | 0.0209286249  |
| -3  | -0.0349805841 | 0.0464639882  | -0.0008588740 |
| -4  | 0.0103523424  | -0.0253097606 | -0.0257592387 |
| -5  | 0.0062170014  | -0.0033485042 | 0.0045937110  |
| -6  | -0.0000694803 | 0.0002312258  | -0.0002051487 |
| -7  | 0.0000697821  | 0.0004560083  | -0.0001747037 |
| -8  | -0.0003447373 | -0.0002182185 | 0.0004701877  |
| -9  | -0.0061621367 | 0.0016613634  | -0.0054546269 |
| -10 | 0.0001523623  | 0.0002836707  | -0.0003420029 |
| -11 | 0.0002166405  | -0.0003053690 | -0.0000919174 |
| -12 | -0.0001289807 | 0.0000597254  | 0.0003176294  |
| -13 | 0.0032082502  | -0.0004746170 | 0.0016194209  |
| -14 | -0.0001805553 | -0.0003301231 | -0.0002995182 |
| -15 | -0.0003271152 | 0.0002920405  | -0.0001240314 |
| -16 | -0.0001129874 | 0.0003229758  | 0.0002829332  |
| -17 | -0.0022716699 | -0.0013064935 | 0.0049103738  |
| -18 | 0.0001003506  | -0.0005864151 | -0.0005299912 |
| -19 | -0.0001138766 | 0.0001314410  | 0.0005168947  |
| -20 | -0.0005617836 | 0.0004129228  | -0.0003464349 |
| -21 | -0.0007481750 | -0.0011336855 | -0.0010822808 |
| -22 | -0.0001479207 | 0.0001235042  | -0.0001831629 |
| -23 | -0.0000707757 | 0.0000517847  | 0.0002904302  |
| -24 | -0.0001549750 | 0.0001478248  | -0.0001572051 |
| -25 | 0.0011547534  | -0.0009943095 | -0.0020330524 |
| -26 | 0.0000788993  | 0.0001671802  | -0.0005485055 |
| -27 | 0.0000436365  | -0.0004549186 | -0.0002198364 |
| -28 | 0.0004206314  | 0.0002222596  | -0.0000557795 |

---

CAS-MP2(6,6)/6-311++G(3df,3pd)//CAS(6,6)/6-311G(d) = -1897.387805

(11) C-Pro-S<sub>0</sub>

---

| Atomic<br>Number | Coordinates (Angstroms) |           |           |
|------------------|-------------------------|-----------|-----------|
|                  | X                       | Y         | Z         |
| 6                | 0.000000                | 0.000000  | 0.000000  |
| 6                | 0.000000                | 0.000000  | 1.494110  |
| 6                | 1.336580                | 0.000000  | 0.746269  |
| 6                | -0.724200               | -1.121988 | 0.748281  |
| 14               | -2.631477               | -0.989987 | 0.709236  |
| 1                | -3.040264               | 0.408539  | 0.467662  |
| 1                | -3.205902               | -1.437516 | 1.990570  |
| 1                | -3.155275               | -1.845209 | -0.373429 |
| 14               | -0.294247               | -2.972787 | 0.876063  |
| 1                | -1.470089               | -3.609519 | 1.508880  |
| 1                | 0.857729                | -3.257231 | 1.746774  |
| 1                | -0.097660               | -3.596857 | -0.445263 |
| 14               | -0.613324               | 1.134584  | -1.367701 |
| 1                | -1.588811               | 0.402295  | -2.196155 |
| 1                | 0.536356                | 1.530253  | -2.200594 |
| 1                | -1.259440               | 2.353453  | -0.844756 |
| 14               | 2.253772                | 1.677852  | 0.777289  |
| 1                | 1.286953                | 2.777100  | 0.974643  |
| 1                | 2.975447                | 1.898803  | -0.488205 |
| 1                | 3.226568                | 1.678221  | 1.887183  |
| 14               | 2.662031                | -1.363919 | 0.635853  |
| 1                | 3.847448                | -0.720881 | 0.027854  |
| 1                | 2.287400                | -2.477843 | -0.251736 |
| 1                | 3.053943                | -1.877565 | 1.960441  |
| 14               | -0.608038               | 1.106193  | 2.887322  |
| 1                | 0.555442                | 1.671448  | 3.594100  |
| 1                | -1.407400               | 0.294056  | 3.822107  |
| 1                | -1.442606               | 2.219892  | 2.396935  |

---

CAS-MP2(6,6)/6-311++G(3df,3pd)//CAS(6,6)/6-311G(d) = -1897.437639

(12) C-TS-S<sub>0</sub>

---

| Atomic<br>Number | Coordinates (Angstroms) |   |   |
|------------------|-------------------------|---|---|
|                  | X                       | Y | Z |

---

|     |  |       |       |          |          |          |
|-----|--|-------|-------|----------|----------|----------|
| 6   |  |       |       | -0.19949 | -0.28941 | -0.02815 |
| 6   |  |       |       | -0.13339 | -1.03968 | 1.24062  |
| 6   |  |       |       | -1.57022 | 0.21039  | 0.07288  |
| 6   |  |       |       | -1.98292 | 1.27568  | 1.04218  |
| 14  |  |       |       | -1.21679 | 2.97572  | 0.83352  |
| 1   |  |       |       | 0.22986  | 2.88438  | 0.55308  |
| 1   |  |       |       | -1.42844 | 3.78653  | 2.04773  |
| 1   |  |       |       | -1.86295 | 3.66     | -0.30587 |
| 14  |  |       |       | -3.30387 | 0.95568  | 2.33362  |
| 1   |  |       |       | -2.68758 | 0.32601  | 3.51852  |
| 1   |  |       |       | -4.35016 | 0.04711  | 1.83067  |
| 1   |  |       |       | -3.92962 | 2.22553  | 2.75229  |
| 14  |  |       |       | -0.64973 | -2.84569 | 1.2832   |
| 1   |  |       |       | 0.52511  | -3.72328 | 1.09042  |
| 1   |  |       |       | -1.62088 | -3.13053 | 0.21135  |
| 1   |  |       |       | -1.25303 | -3.17142 | 2.58999  |
| 14  |  |       |       | -2.81386 | -0.29678 | -1.2675  |
| 1   |  |       |       | -3.03553 | 0.84167  | -2.18429 |
| 1   |  |       |       | -4.11171 | -0.69466 | -0.69925 |
| 1   |  |       |       | -2.24857 | -1.42168 | -2.03756 |
| 14  |  |       |       | 0.74122  | -0.26169 | 2.72421  |
| 1   |  |       |       | 0.0727   | 0.95274  | 3.22466  |
| 1   |  |       |       | 2.113    | 0.10876  | 2.31604  |
| 1   |  |       |       | 0.81648  | -1.24831 | 3.82152  |
| 14  |  |       |       | 0.91668  | -0.52019 | -1.50364 |
| 1   |  |       |       | 0.42281  | 0.32255  | -2.60853 |
| 1   |  |       |       | 0.95552  | -1.93082 | -1.9394  |
| 1   |  |       |       | 2.28716  | -0.11496 | -1.14268 |
| -1  |  | -0.31 | -0.12 | 0.13     |          |          |
| -2  |  | 0.35  | -0.08 | 0.13     |          |          |
| -3  |  | -0.03 | 0.34  | -0.25    |          |          |
| -4  |  | -0.00 | -0.12 | -0.00    |          |          |
| -5  |  | 0.01  | -0.02 | 0.01     |          |          |
| -6  |  | 0.01  | 0.00  | -0.02    |          |          |
| -7  |  | -0.02 | 0.01  | -0.01    |          |          |
| -8  |  | -0.04 | -0.05 | 0.03     |          |          |
| -9  |  | -0.02 | 0.01  | -0.01    |          |          |
| -10 |  | 0.06  | 0.01  | -0.05    |          |          |
| -11 |  | -0.04 | -0.03 | 0.08     |          |          |

|     |       |       |       |
|-----|-------|-------|-------|
| -12 | -0.01 | -0.01 | 0.04  |
| -13 | 0.05  | -0.01 | 0.00  |
| -14 | -0.15 | -0.25 | -0.05 |
| -15 | -0.06 | 0.21  | 0.03  |
| -16 | -0.02 | 0.14  | 0.01  |
| -17 | 0.00  | 0.05  | -0.04 |
| -18 | -0.28 | -0.16 | -0.24 |
| -19 | 0.14  | -0.04 | 0.21  |
| -20 | -0.01 | -0.02 | 0.03  |
| -21 | 0.01  | 0.00  | 0.02  |
| -22 | -0.02 | 0.03  | -0.03 |
| -23 | 0.01  | 0.04  | 0.06  |
| -24 | 0.03  | 0.05  | 0.07  |
| -25 | -0.04 | -0.03 | 0.00  |
| -26 | -0.00 | 0.01  | 0.04  |
| -27 | 0.13  | -0.01 | -0.04 |
| -28 | -0.16 | 0.13  | 0.20  |

---

CAS-MP2(6,6)/6-311++G(3df,3pd)//CAS(6,6)/6-311G(d) = -1897.413472
